# Supplementary material
Source: Springer Nature journal article supplement (https://www.springermedizin.de/resource/supplementary/12887_2012_720_MOESM1_ESM.pdf/9475574)

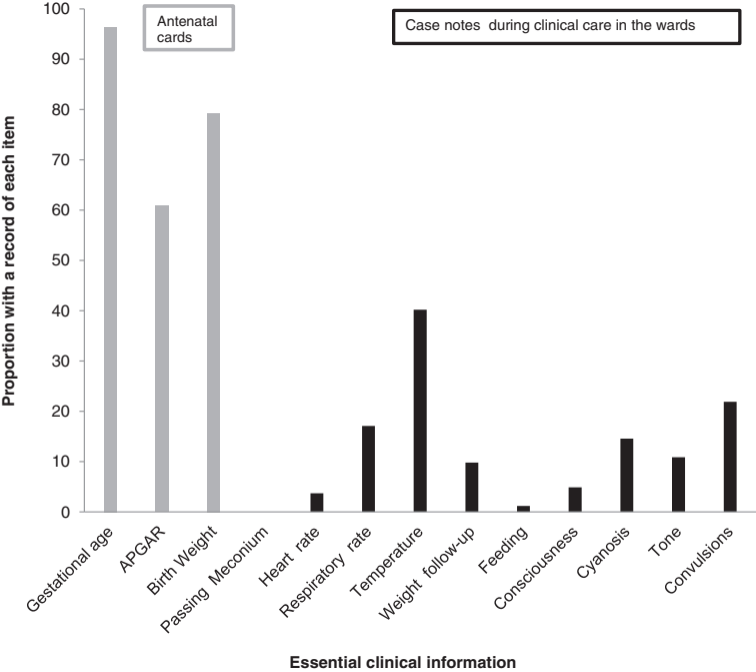

Supplement: MOESM1 [file 9475574]
